# Supplementary material for: Industrial production of ultra-stable sulfonated graphene quantum dots for Golgi apparatus imaging
Source: Royal Society of Chemistry journal article supplement (doi:10.1039/c7tb01348e), 2017-01-01
Supplement: c7tb01348e1.pdf [file c7tb01348e1.pdf]

## ***Supporting Information***

### **Industrial production of ultra-stable sulfonated graphene quantum dots for Golgi apparatus imaging**

Liang Wang,<sup>a,‡</sup> Bin Wu,<sup>b,‡</sup> Weitao Li,<sup>a</sup> Zhen Li,<sup>c</sup> Jing Zhan,<sup>c</sup> Bijiang Geng,<sup>c</sup> Shilong Wang,<sup>\*,b</sup> Dengyu Pan,<sup>\*,c</sup> Minghong Wu<sup>c</sup>

<sup>a</sup> Institute of Nanochemistry and Nanobiology, Shanghai University, Shanghai 200444, P.R. China

<sup>b</sup> Research Center for Translational Medicine at East Hospital, School of Life Science and Technology, Tongji University, Shanghai 200092, P.R. China

<sup>c</sup> School of Environmental and Chemical Engineering, Shanghai University, Shanghai 200444, P.R. China

The authors contributed equally to this work. Correspondence and requests for materials should be addressed to D.P. and S.W. (email: dypan617@shu.edu.cn, wsl@tongji.edu.cn).

## Supporting Figures.

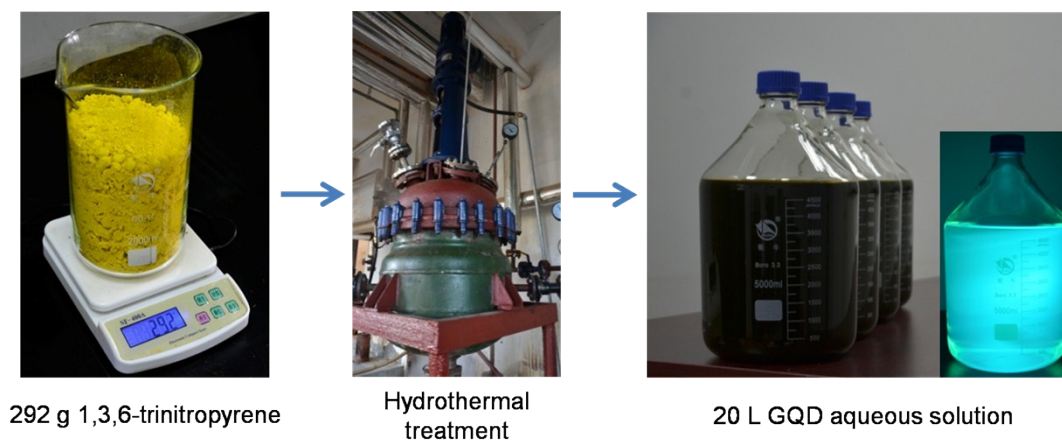

**Fig. S1** The preparation procedure for GQDs on an industrial scale.

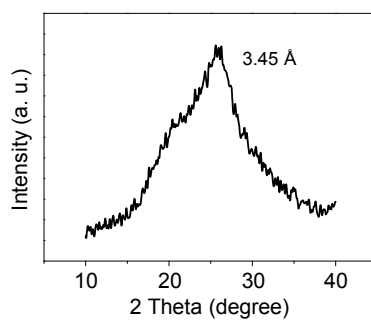

**Fig. S2** XRD pattern of sulfonated GQDs.
